# Supplementary material for: Hydrogen evolution catalyzed by MoS3 and MoS2 particles
Source: Royal Society of Chemistry journal article supplement (doi:10.1039/c2ee02835b), 2012-01-01
Supplement: c2ee02835b.pdf [file c2ee02835b.pdf]

## Electronic Supplementary Information

### Hydrogen evolution catalyzed by MoS<sub>3</sub> and MoS<sub>2</sub> particles

Heron Vrubel, Daniel Merki and Xile Hu\*

Laboratory of Inorganic Synthesis and Catalysis, Institute of Chemical Sciences and  
Engineering, Ecole Polytechnique Fédérale de Lausanne (EPFL), SB-ISIC-LSCI, BCH 3305,  
Lausanne, CH 1015, Switzerland

\* To whom correspondence should be addressed. E-mail: [xile.hu@epfl.ch](mailto:xile.hu@epfl.ch)

### Ohmic drop correction:

The ohmic drop correction of polarization curves has been performed according to the method given in the literature [1-3]. The overpotential  $\eta$  (V) observed during an experiment is given by equation (1):

$$\eta = a + b \ln j + jR \quad (1)$$

where  $a$  (V) is the Tafel constant,  $b$  (V dec<sup>-1</sup>) is the Tafel slope,  $j$  (A cm<sup>-2</sup>) is the current density and  $R$  ( $\Omega$  cm<sup>2</sup>) is the total area-specific uncompensated resistance of the system, which is assumed to be constant. The derivative of Eq. (1) with respect to current density gives Eq. (2) from which  $b$  and  $R$  can be easily obtained by plotting  $d\eta/dj$  as a function of  $1/j$ .

$$\frac{d\eta}{dj} = \frac{b}{j} + R \quad (2)$$

The estimation of  $R$  allows correcting the experimental overpotential by subtracting the ohmic drop  $jR$  according to equation (3):

$$\eta_{corr} = \eta - jR \quad (3)$$

During the calculations, the derivative  $d\eta/dj$  was replaced by their finite elements  $\Delta\eta/\Delta j$  estimated from each pair of consecutive experimental points.

### Reference

- [1] D.M. Schub, M.F. Reznik, *Elektrokhimiya*, 21 (1985) 937
- [2] N. Krstajic, S. Trasatti, *Journal of Applied Electrochemistry*. 28 (1998) 1291
- [3] L.A. De Faria, J.F.C. Boodts, S. Trasatti, *Journal of Applied Electrochemistry*, 26 (1996) 1195

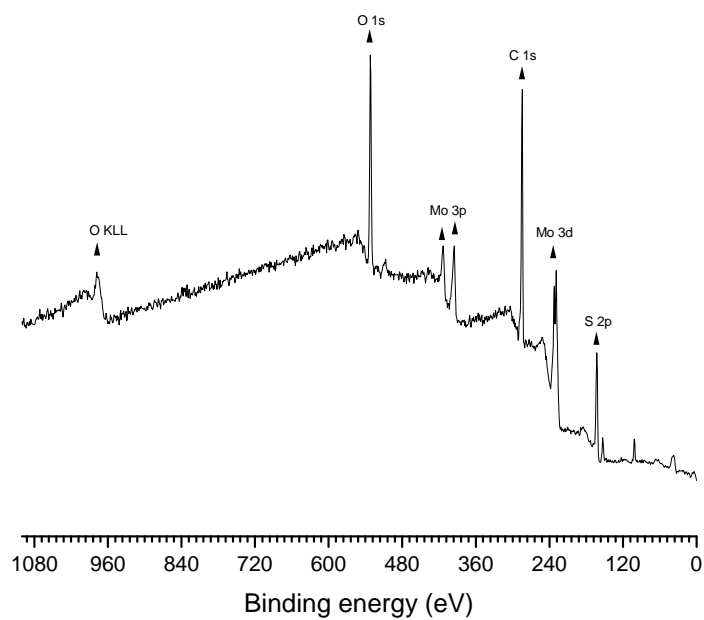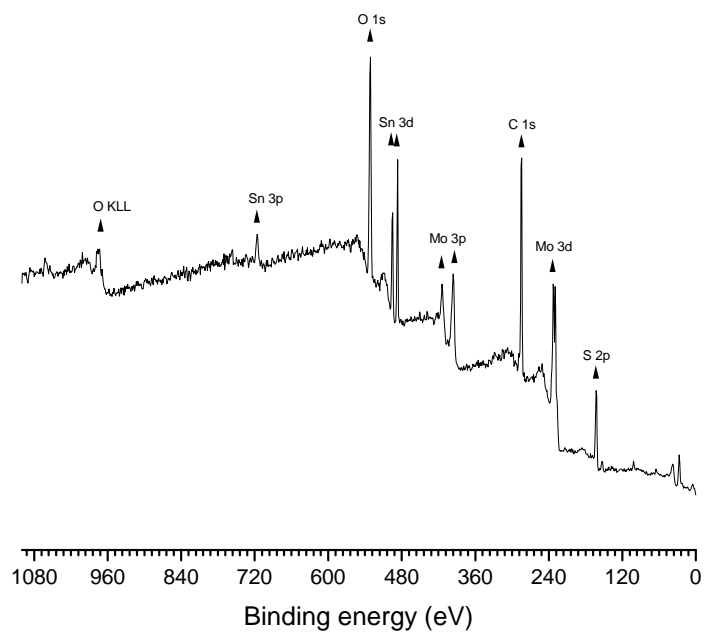

**Fig. S1.** XPS survey spectra of the  $\text{MoS}_3$  particles before (top) and after (bottom) polarization.

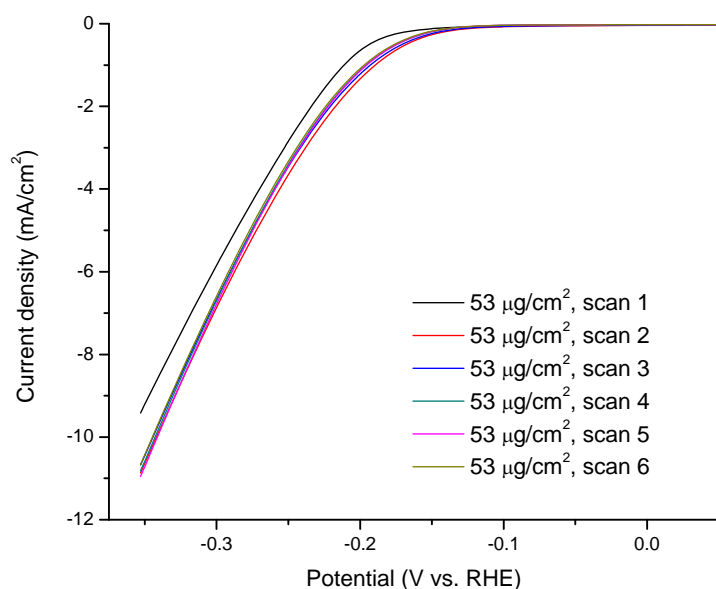

**Fig. S2.** Consecutive polarization curves of a freshly prepared MoS<sub>3</sub>-modified FTO electrode (drop casting) recorded at pH = 0 (1.0 M H<sub>2</sub>SO<sub>4</sub>); scan rate: 5 mV/s.

**Table S1.** HER activity of drop-casted MoS<sub>3</sub>-modified FTO electrodes according to polarization measurements.

| Loading<br>(µg/cm <sup>2</sup> ) | log j <sub>0</sub> (log[mA/cm <sup>2</sup> ]) | Tafel Slope<br>(mV/decade) | j <sub>η=150</sub><br>(mA/cm <sup>2</sup> ) | j <sub>η=200</sub><br>(mA/cm <sup>2</sup> ) |
|----------------------------------|-----------------------------------------------|----------------------------|---------------------------------------------|---------------------------------------------|
| 13                               | -4.0                                          | 60 <sup>a</sup>            | -0.019                                      | -0.14                                       |
| 27                               | -4.0                                          | 52 <sup>b</sup>            | -0.056                                      | -0.49                                       |
| 40                               | -3.7                                          | 53 <sup>c</sup>            | -0.13                                       | -0.79                                       |
| 53                               | -3.4                                          | 56 <sup>d</sup>            | -0.18                                       | -1.1                                        |
| 75                               | -2.9                                          | 61 <sup>e</sup>            | -0.22                                       | -1.0                                        |

<sup>a</sup> Determined at η = 140 – 196 mV; <sup>b</sup> Determined at η = 140 – 190 mV; <sup>c</sup> Determined at η = 119 – 158 mV; <sup>d</sup> Determined at η = 119 – 166 mV; <sup>e</sup> Determined at η = 112 – 158 mV.

**Table S2.** HER activity of spray-casted MoS<sub>3</sub>-modified FTO electrodes according to polarization measurements.

| Loading<br>( $\mu\text{g}/\text{cm}^2$ ) | $\log j_0$ ( $\log[\text{mA}/\text{cm}^2]$ ) | Tafel Slope<br>(mV/decade) | $j_{\eta=150}$<br>( $\text{mA}/\text{cm}^2$ ) | $j_{\eta=200}$<br>( $\text{mA}/\text{cm}^2$ ) |
|------------------------------------------|----------------------------------------------|----------------------------|-----------------------------------------------|-----------------------------------------------|
| 18                                       | -4.8                                         | 45 <sup>a</sup>            | 0.040                                         | 0.47                                          |
| 100                                      | -4.4                                         | 38 <sup>b</sup>            | 0.40                                          | 2.8                                           |
| 200                                      | -3.8                                         | 40 <sup>c</sup>            | 0.73                                          | 3.6                                           |
| 300                                      | -3.3                                         | 44 <sup>d</sup>            | 1.02                                          | 3.9                                           |
| 400                                      | -3.2                                         | 45 <sup>e</sup>            | 1.03                                          | 3.9                                           |

<sup>a</sup> Determined at  $\eta = 146 - 186$  mV; <sup>b</sup> Determined at  $\eta = 109 - 145$  mV; <sup>c</sup> Determined at  $\eta = 110 - 134$  mV; <sup>d</sup> Determined at  $\eta = 98 - 125$  mV; <sup>e</sup> Determined at  $\eta = 97 - 124$  mV.

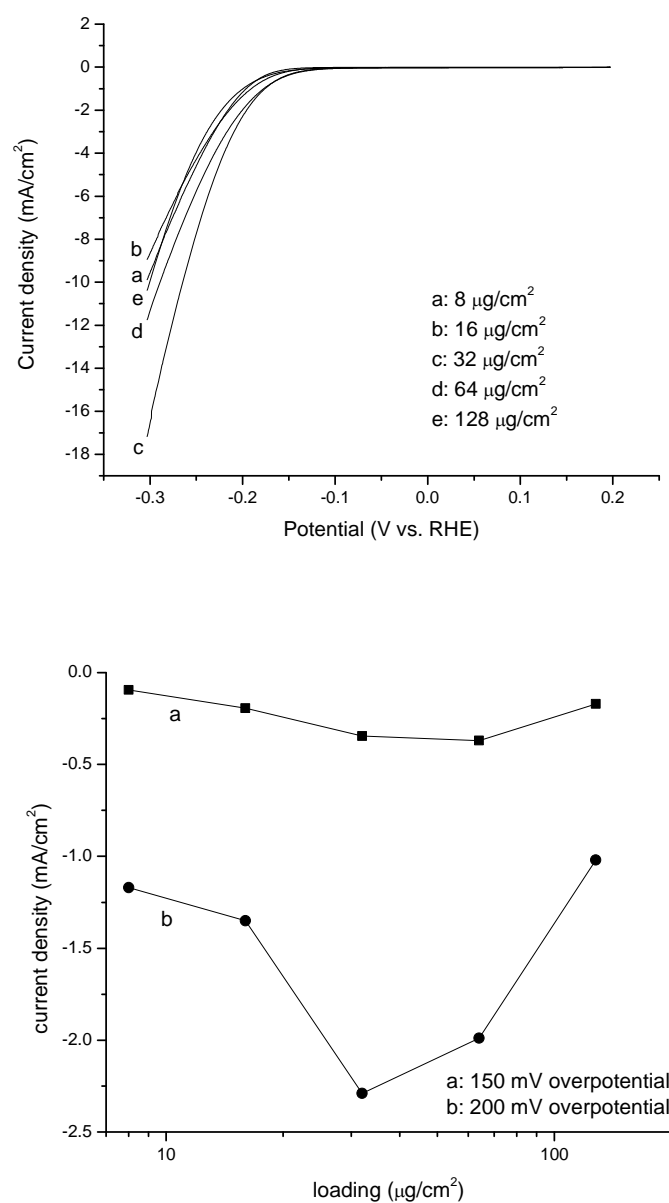

**Fig. S3** (Top) Polarization curves of spray-casted MoS<sub>3</sub>-modified glassy carbon electrodes recorded at pH = 0 (1.0 M H<sub>2</sub>SO<sub>4</sub>); scan rate: 5 mV/s. (Bottom) Loading-dependence of current densities.

**Table S3.** HER activity of spray-casted MoS<sub>3</sub>-modified glassy carbon electrodes according to polarization measurements.

| Loading<br>(μg/cm <sup>2</sup> ) | log j <sub>0</sub> (log[mA/cm <sup>2</sup> ]) | Tafel Slope<br>(mV/decade) | j <sub>η=150</sub><br>(mA/cm <sup>2</sup> ) | j <sub>η=200</sub><br>(mA/cm <sup>2</sup> ) |
|----------------------------------|-----------------------------------------------|----------------------------|---------------------------------------------|---------------------------------------------|
| 26                               | -4.6                                          | 43 <sup>a</sup>            | 0.083                                       | 0.95                                        |
| 77                               | -4.4                                          | 40 <sup>b</sup>            | 0.26                                        | 2.5                                         |
| 129                              | -4.2                                          | 39 <sup>c</sup>            | 0.48                                        | 4.4                                         |
| 180                              | -4.1                                          | 39 <sup>d</sup>            | 0.49                                        | 4.1                                         |
| 231                              | -3.9                                          | 41 <sup>e</sup>            | 0.58                                        | 3.5                                         |

<sup>a</sup> Determined at η = 139 - 175 mV; <sup>b</sup> Determined at η = 125 - 159 mV; <sup>c</sup> Determined at η = 112 - 153 mV; <sup>d</sup> Determined at η = 113 - 151 mV; <sup>e</sup> Determined at η = 107 - 144 mV.

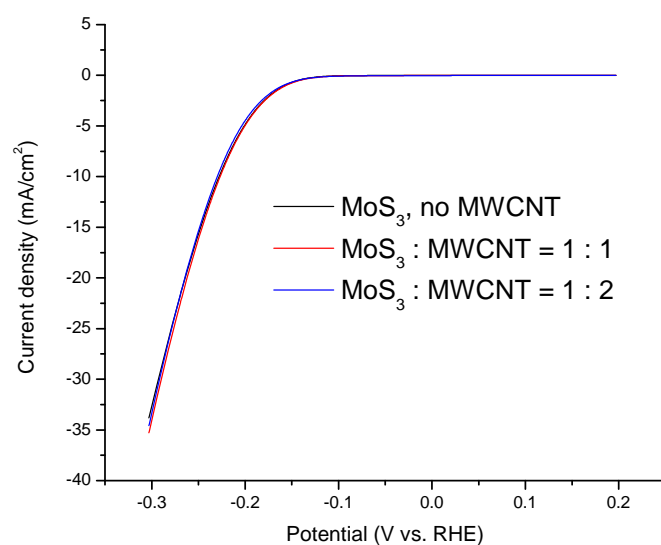

**Fig. S4** Polarization curves of spray-casted MoS<sub>3</sub>-modified glassy carbon electrodes, with MWCNT as additive, recorded at pH = 0 (1.0 M H<sub>2</sub>SO<sub>4</sub>); scan rate: 5 mV/s. The loading of MoS<sub>3</sub> is always 130 μg/cm<sup>2</sup>.

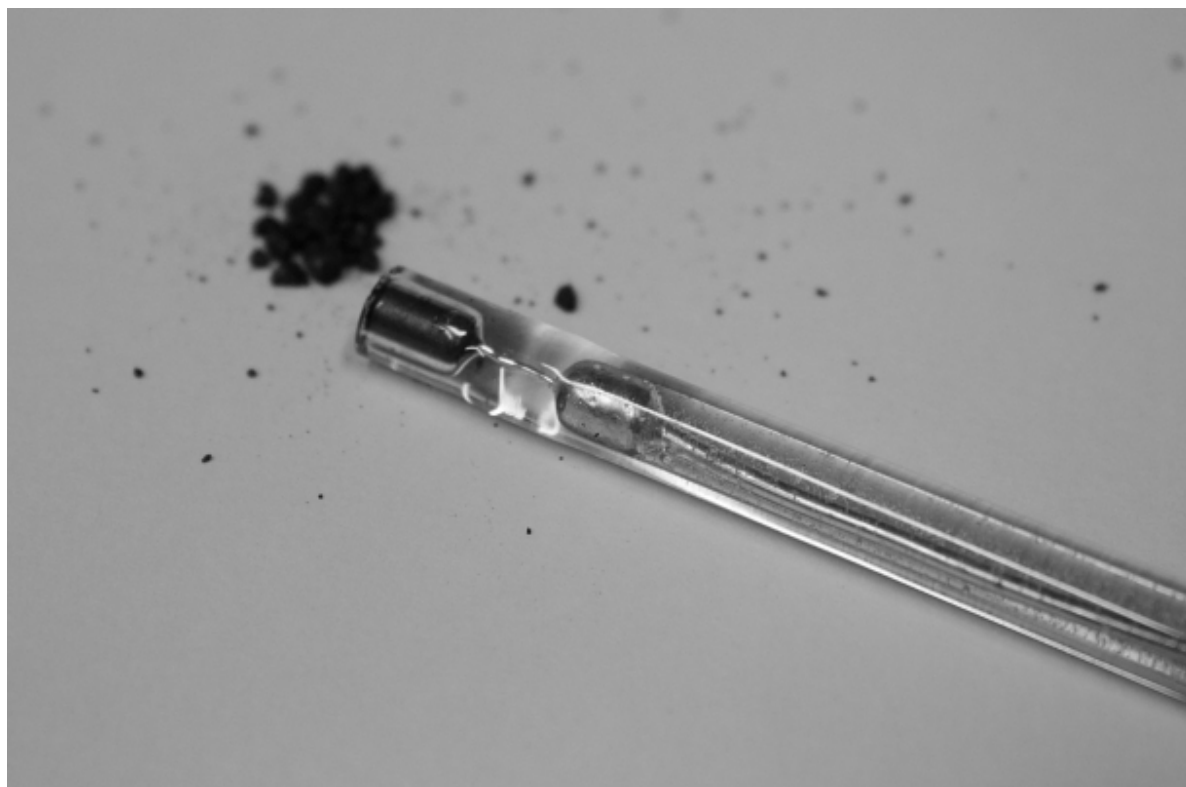

**Fig. S5** The home-made working electrode filled with conductive graphite powder.

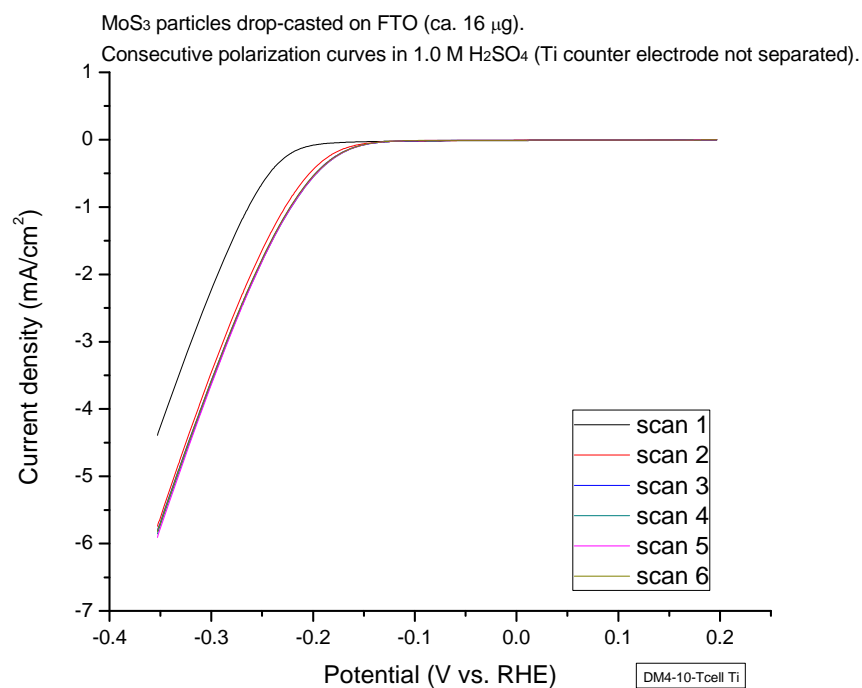

**Fig. S6** Consecutive polarization curves of a freshly prepared MoS<sub>3</sub>-modified FTO electrode (drop casting) recorded at pH = 0 (1.0 M H<sub>2</sub>SO<sub>4</sub>); scan rate: 5 mV/s. Ti electrode was used as a counter electrode.

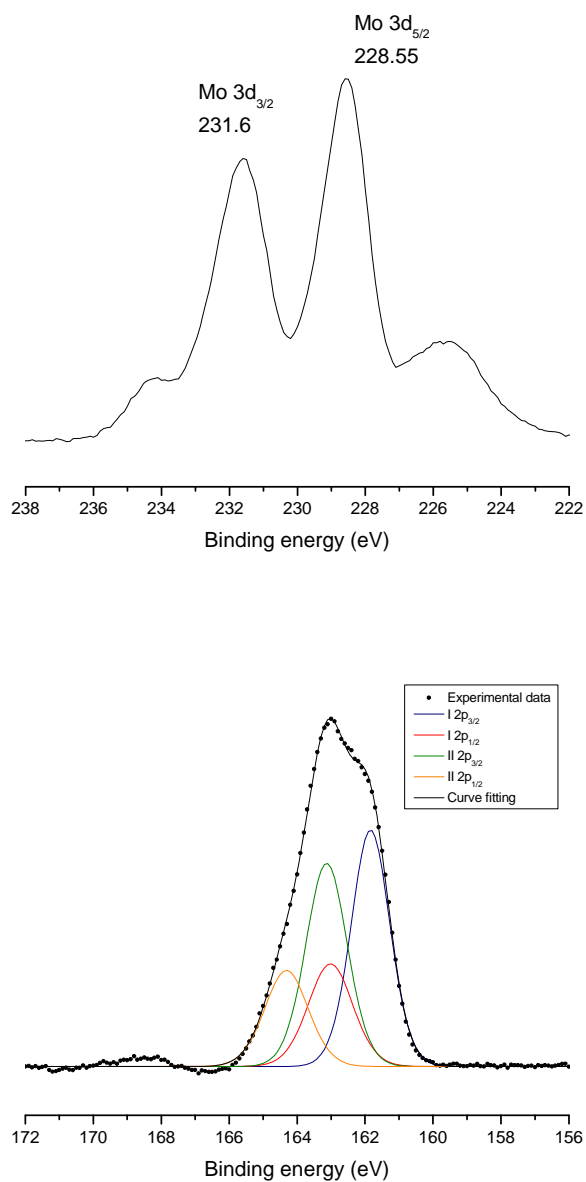

**Fig. S7** XPS spectra of the MoS<sub>3</sub>-modified electrode after five minutes of electrolysis. (Top) Mo spectrum; (bottom) S 2p spectrum.

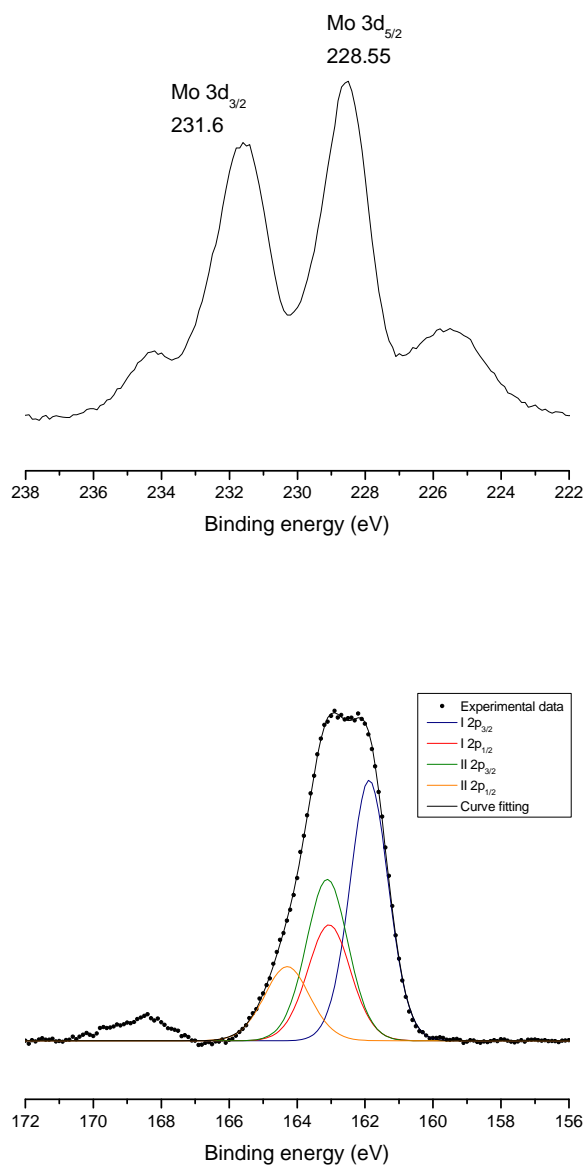

**Fig. S8** XPS spectra of the MoS<sub>3</sub>-modified electrode after ten minutes of electrolysis. (Top) Mo spectrum; (bottom) S 2p spectrum.

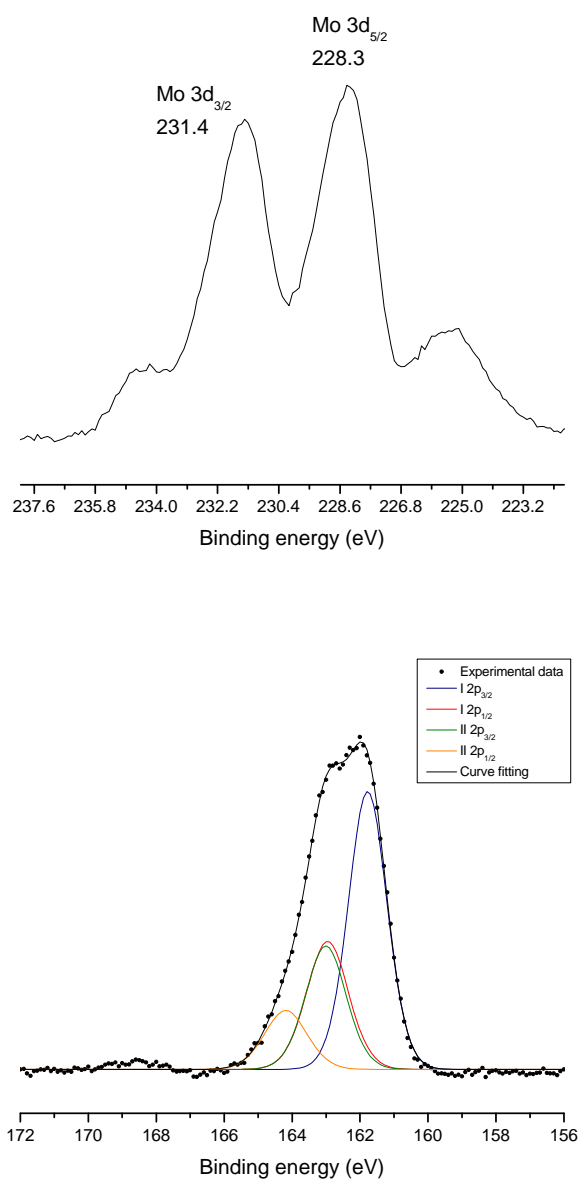

**Fig. S9** XPS spectra of the MoS<sub>x</sub> species prepared by reduction of MoS<sub>3</sub> with NaBH<sub>4</sub>. (Top) Mo spectrum; (bottom) S 2p spectrum.

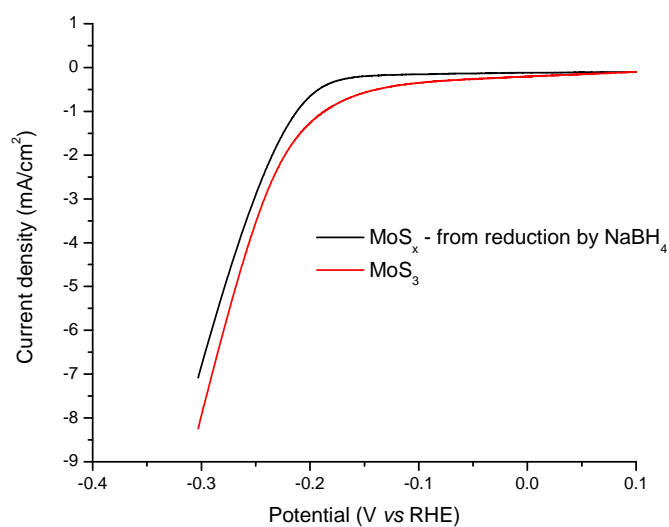

**Fig. S10** Polarization curves of FTO electrodes modified by MoS<sub>x</sub> species prepared by reduction with NaBH<sub>4</sub>, and by MoS<sub>3</sub> particles recorded at pH = 0 (1.0 M H<sub>2</sub>SO<sub>4</sub>); scan rate: 5 mV/s. The electrodes were made using the same loading of catalysts and drop casting.

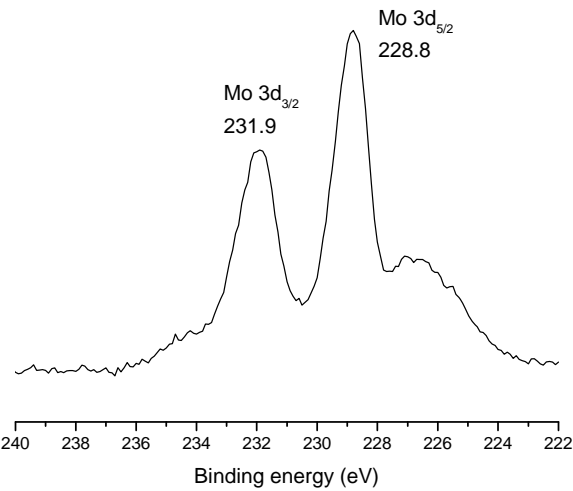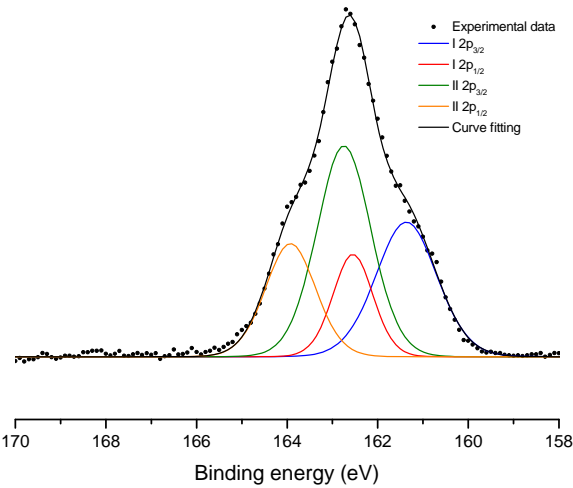

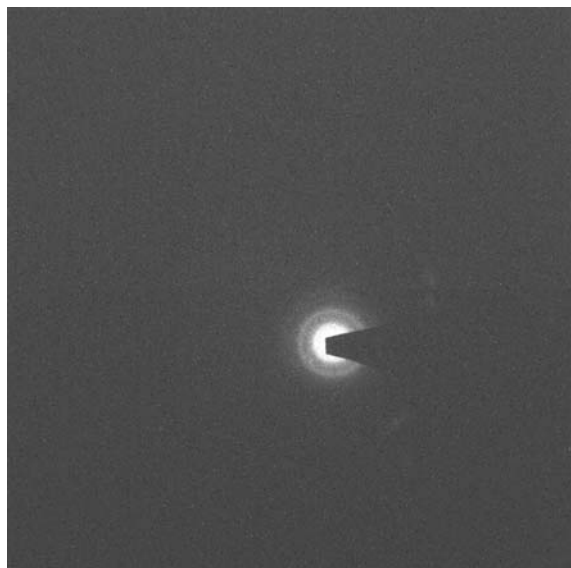

**Fig. S11** XPS spectra and electron diffraction pattern of the MoS<sub>3</sub>-350 particles. The Mo/S ratio is 1:3.1. For S 2p region; binding energies (eV): doublet I: 2p<sub>3/2</sub>, 162.0; 2p<sub>1/2</sub>, 163.2; doublet II: 2p<sub>3/2</sub>, 163.3; 2p<sub>1/2</sub>, 164.5.

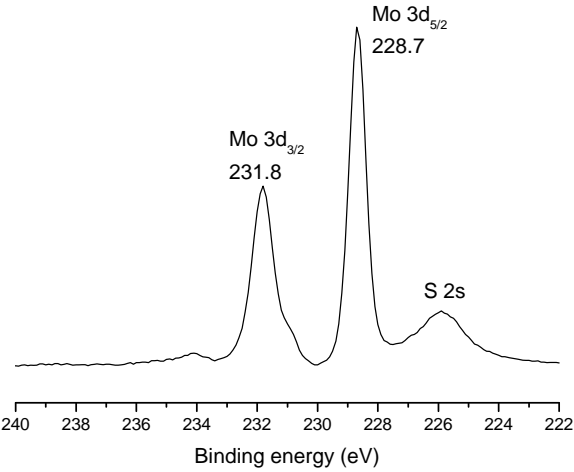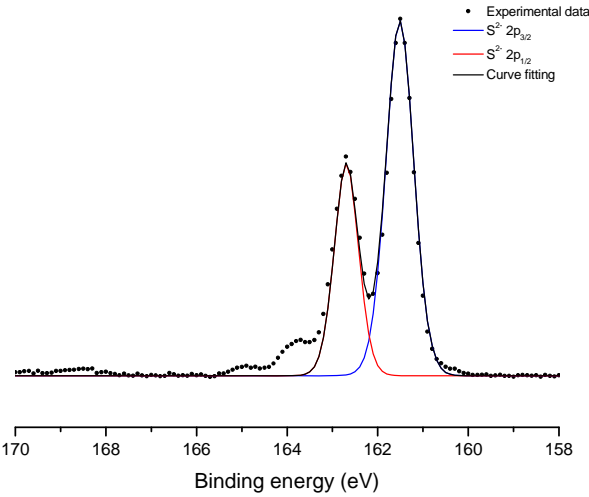

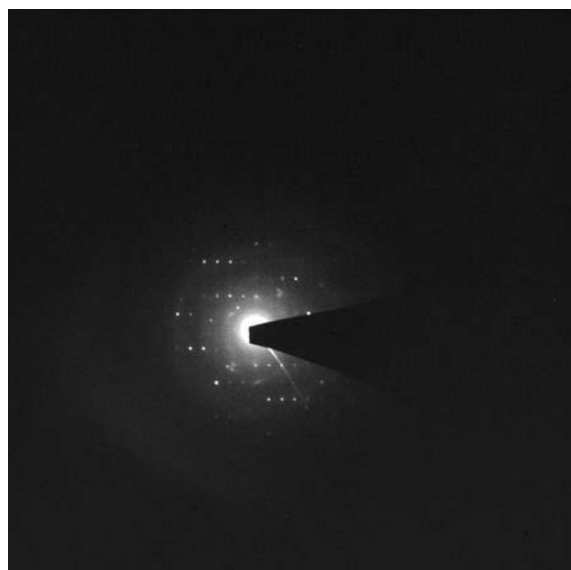

**Fig. S12** XPS spectra and electron diffraction pattern of the MoS<sub>2</sub>-650 particles. The Mo/S ratio is 1:2.

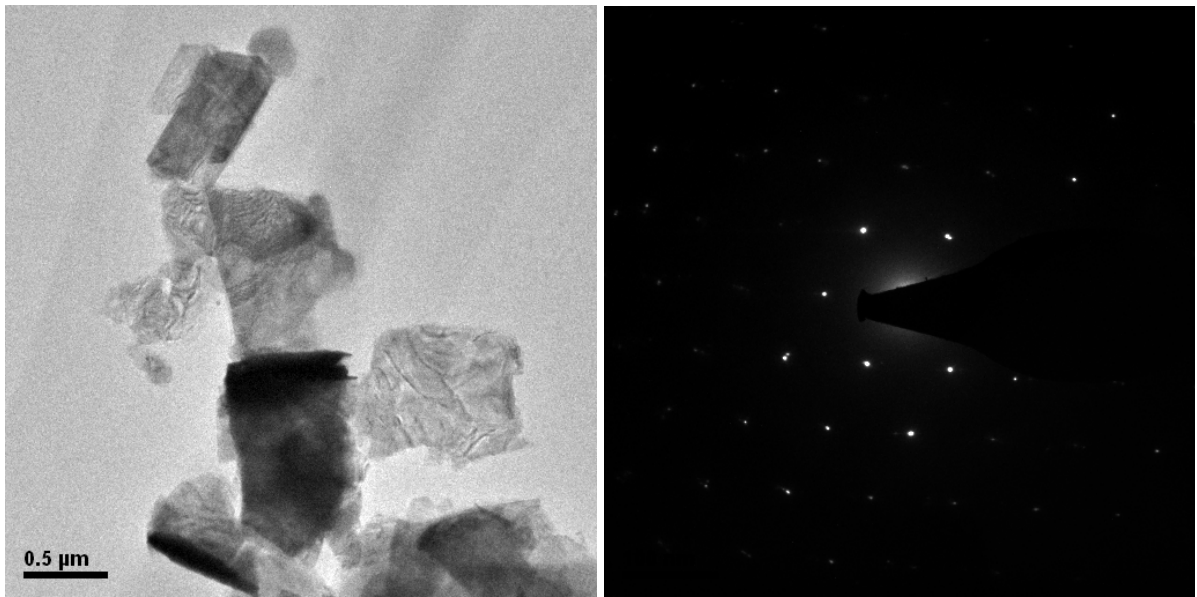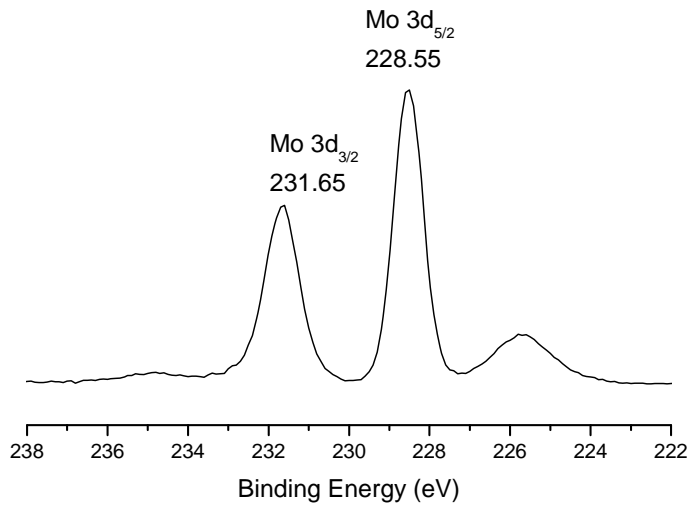

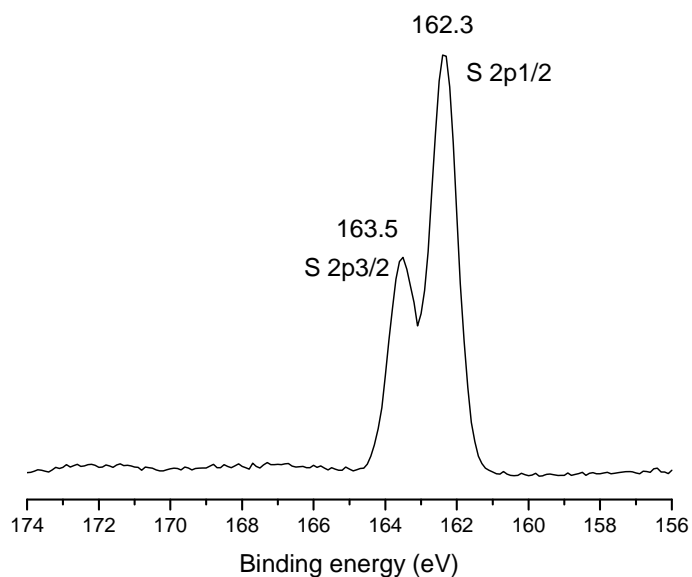

**Fig. S13** (Top) TEM image (left) and electron diffraction pattern of commercial MoS<sub>2</sub> particles. (Middle) XPS Mo spectrum of commercial MoS<sub>2</sub> particles. The spectrum shows a peak at lower binding energies, which is the S 2s peak. (Bottom) XPS S spectrum of commercial MoS<sub>2</sub> particles. The S/Mo ratio is 2.1 for MoS<sub>2</sub> particle.
